# Supplementary material for: Super-Cationic Peptide Dendrimers—Synthesis and Evaluation as Antimicrobial Agents
Source: MDPI journal article supplement (doi:10.3390/antibiotics10060695), 2021-06-10
Supplement: s1 [file s1]

# Super-Cationic Peptide Dendrimers. Synthesis and Evaluation as Antimicrobial Agents.

Estelle J. Ramchuran<sup>1,2,§</sup>, Isabel Pérez-Guillén<sup>3,§</sup>, Linda A. Bester<sup>1</sup>, René Khan<sup>4</sup>, Fernando Albericio<sup>2,5,6\*</sup>, Miguel Viñas<sup>3\*</sup>, and Beatriz G. de La Torre<sup>7\*</sup>

<sup>1</sup> Biomedical Resource Unit, School of Laboratory Medicine and Medical Sciences, College of Health Sciences, University of KwaZulu-Natal, Durban 4000, South Africa

<sup>2</sup> Peptide Sciences Laboratory, School of Chemistry and Physics, University of KwaZulu-Natal, University Road, Westville, Durban 4001, South Africa

<sup>3</sup> Lab. Molecular Microbiology & Antimicrobials. Department of Pathology and Experimental Therapeutics, Medical School-IDIBELL, University of Barcelona, Hospitalet, Barcelona 08907, Spain

<sup>4</sup> Discipline of Medical Biochemistry, School of Laboratory Medicine and Medical Science, University of KwaZulu-Natal, Durban, South Africa.

<sup>5</sup> Institute for Advanced Chemistry of Catalonia (IQAC-CSIC), 08034-Barcelona, Spain

<sup>6</sup> CIBER-BBN, Networking Centre on Bioengineering, Biomaterials and Nanomedicine, and Department of Organic Chemistry, University of Barcelona, 08028-Barcelona, Spain

<sup>7</sup> KRISP, College of Health Sciences, University of KwaZulu-Natal, Westville, Durban 4001, South Africa

§ These two authors contribute equally to the paper.

\* Correspondence: [garciadelatorreb@ukzn.ac.za](mailto:garciadelatorreb@ukzn.ac.za), [mvinyas@ub.edu](mailto:mvinyas@ub.edu), [albericio@ukzn.ac.za](mailto:albericio@ukzn.ac.za)

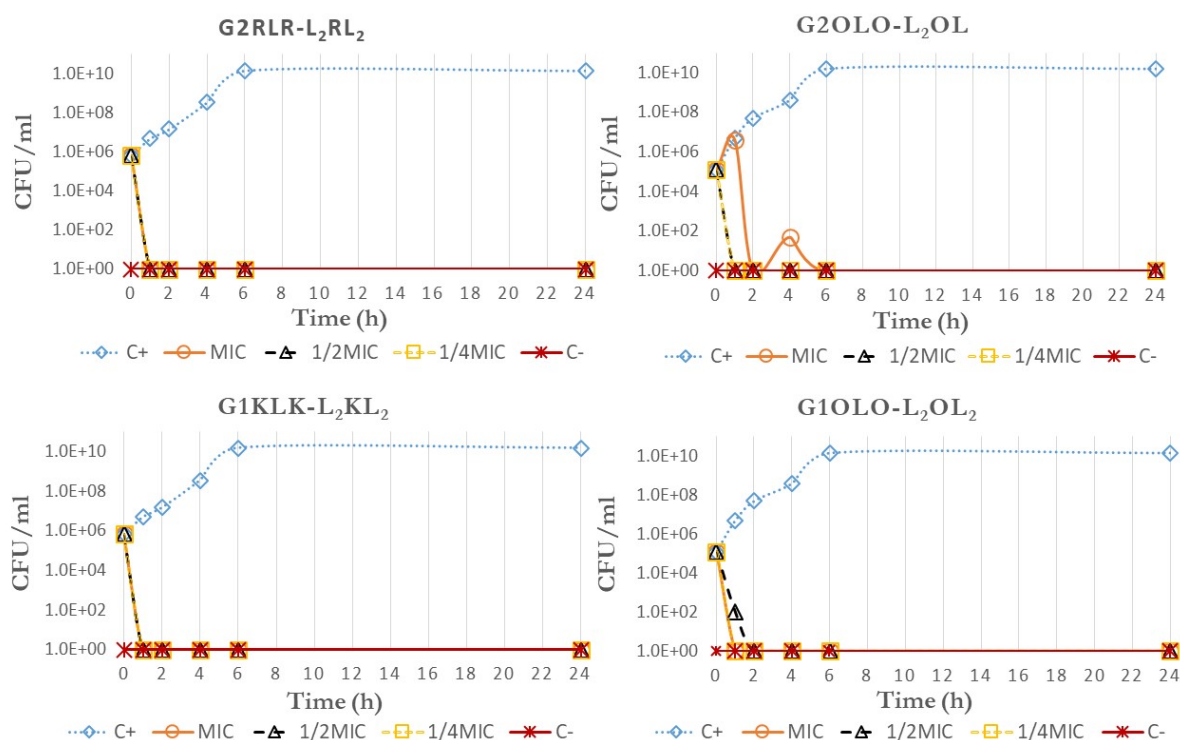

**Figure S1.** 24 h Time-kill curves against *E. coli* for G2RLR-L<sub>2</sub>RL<sub>2</sub>, G2OLO-L<sub>2</sub>OL<sub>2</sub>, G1KLK-L<sub>2</sub>KL<sub>2</sub>, and G1OLO-L<sub>2</sub>OL<sub>2</sub>

Analytical LC-MS was performed in a Thermo Scientific™ UltiMate™ 3000 Standard Binary System, ISQ™ EC Single Quadrupole. Buffer A: 0.1% formic acid in H<sub>2</sub>O; buffer B: 0.1% formic acid in CH<sub>3</sub>CN; Flow: 1.0 mL/min., UV detection=220 nm; Mass were registered in positive mode; Column: Phenomenex Luna C18 3.6 μm, 4.6 × 150 mm column, 30 °C. The method is specified for each chromatogram.

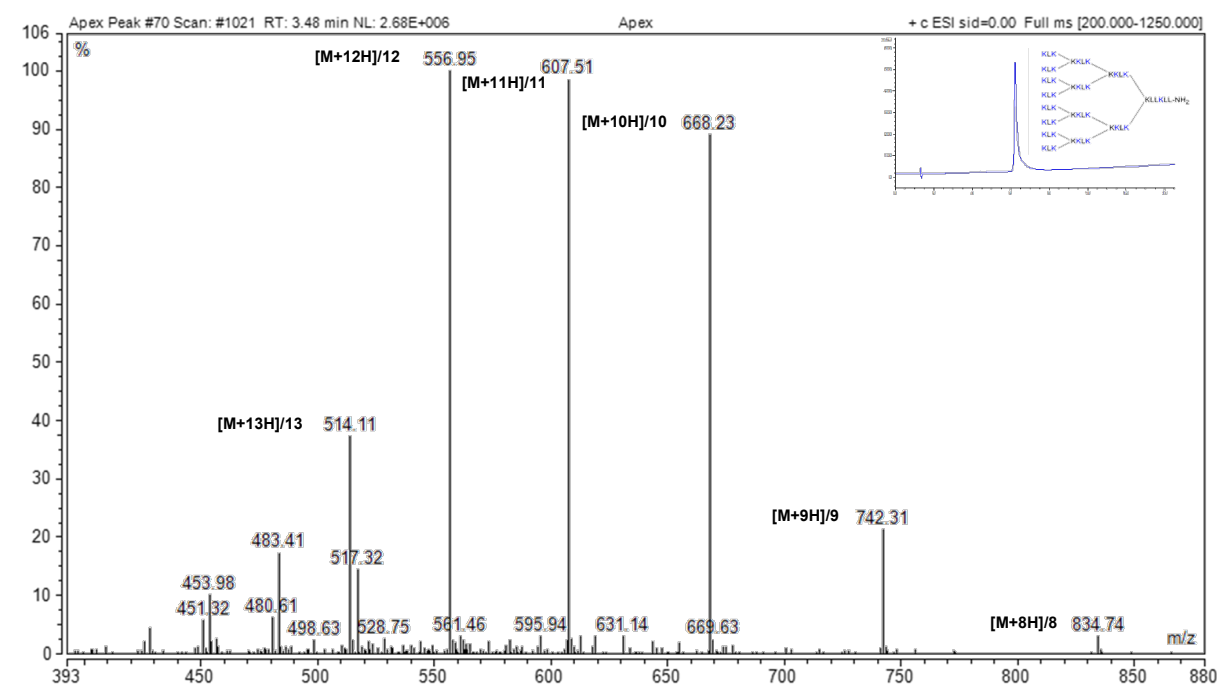

## G2KLK-L<sub>2</sub>KL<sub>2</sub>: MW=3199.43

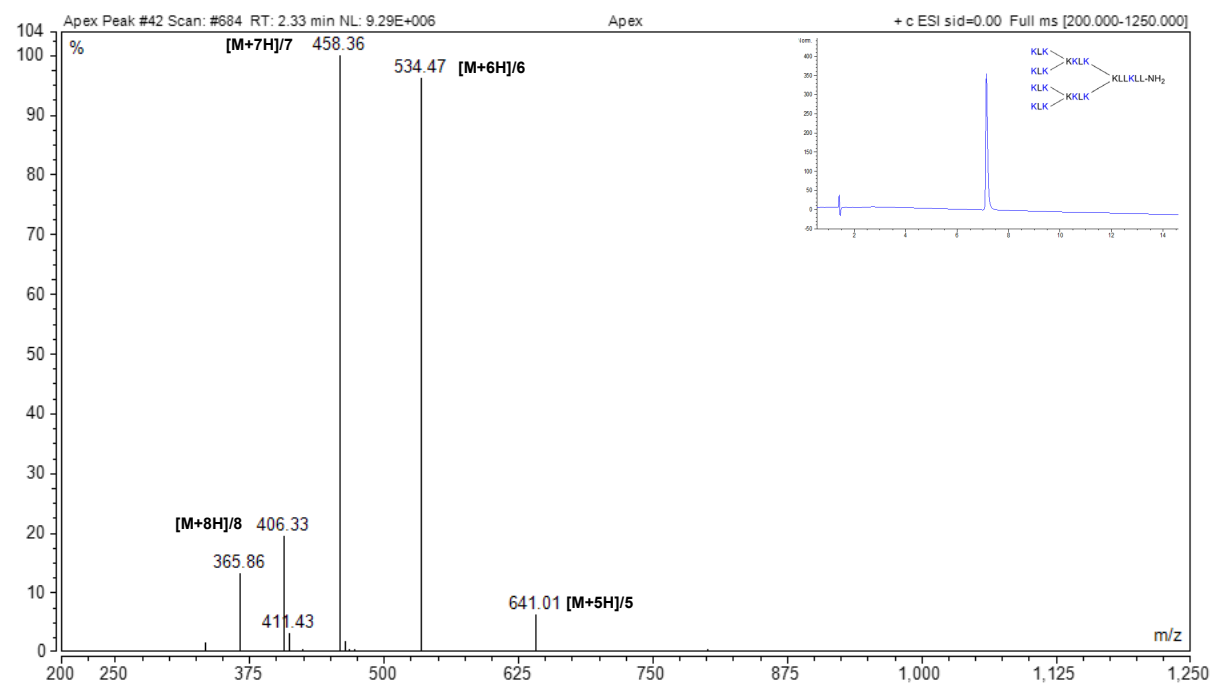

Method: 10% to 60% of B into A in 15 min.

## Ac-G2KLK-L<sub>2</sub>KL<sub>2</sub>: MW=3367.58

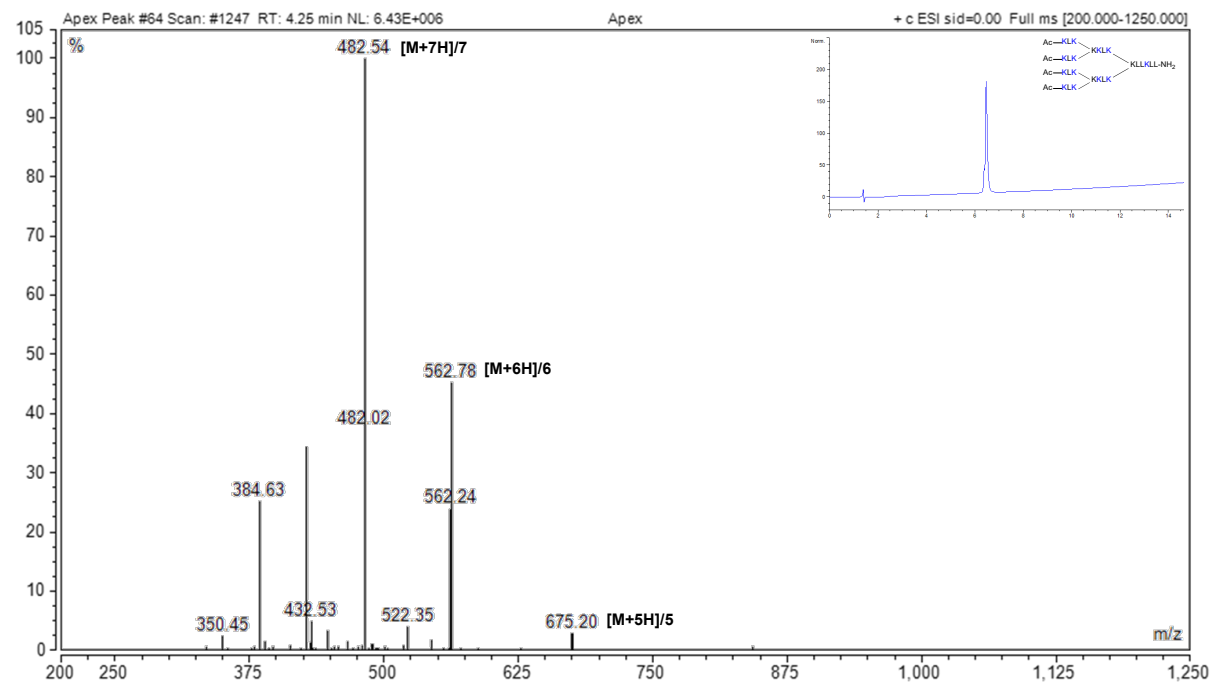

Method: 20% to 60% of B into A in 15 min.

# Hx-G2KLK-L<sub>2</sub>KL<sub>2</sub>: MW=3592.68

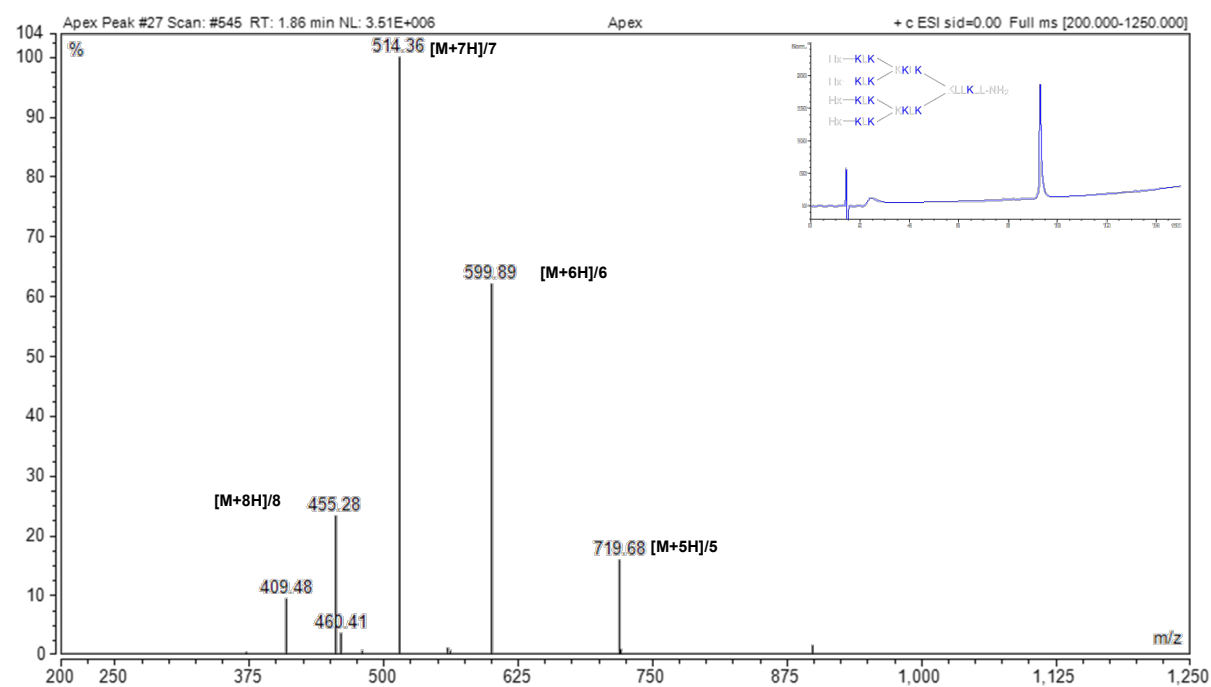

# Dd-G2KLK-L<sub>2</sub>KL<sub>2</sub>: MW=3928.66

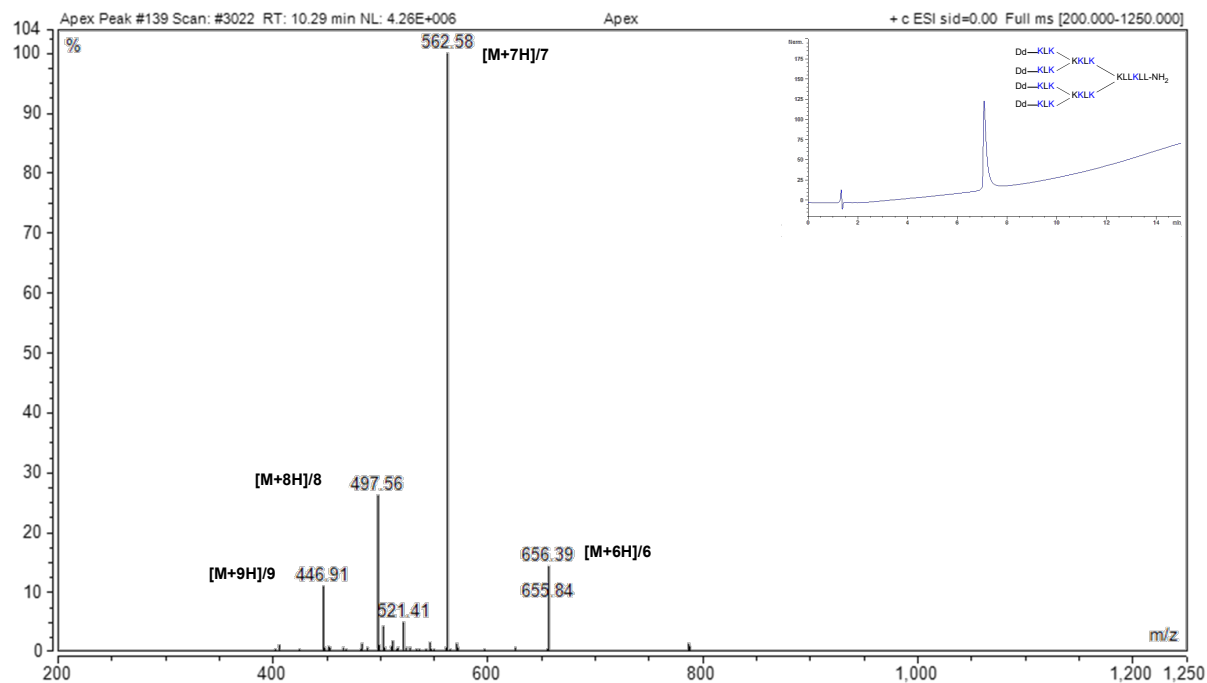

## G2RLR-L<sub>2</sub>RL<sub>2</sub>: MW=3562.61

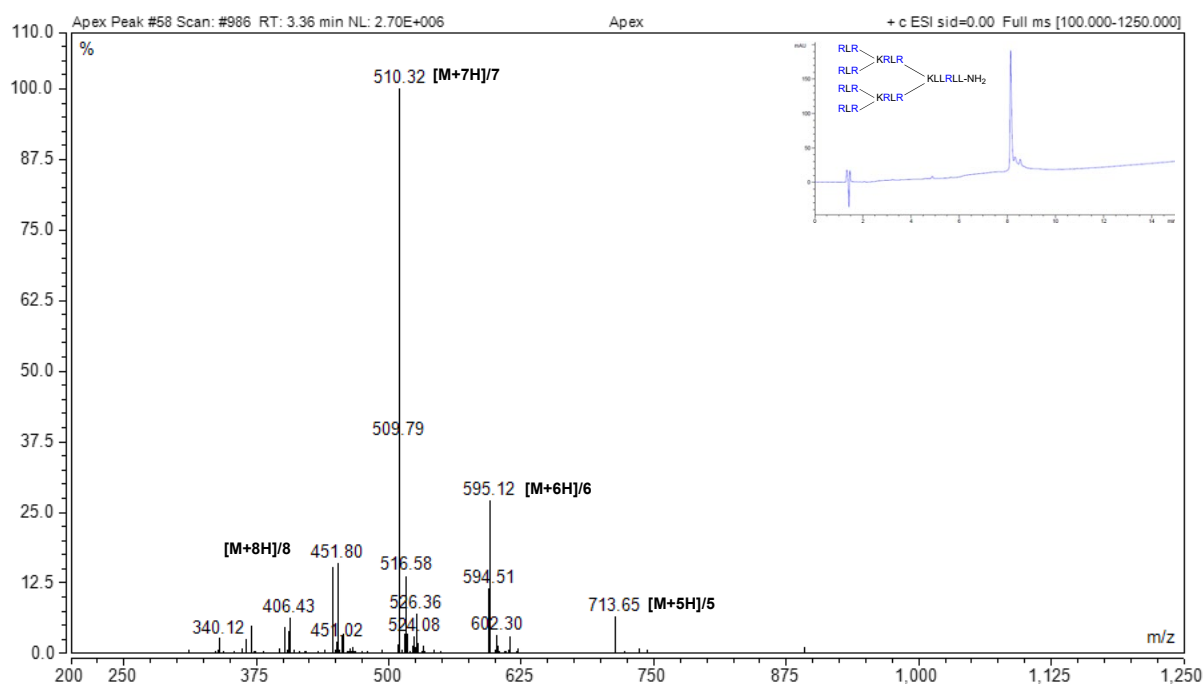

Method: 10% to 60% of B into A in 15 min

## G2OLO-L<sub>2</sub>KL<sub>2</sub>: MW=3017.08

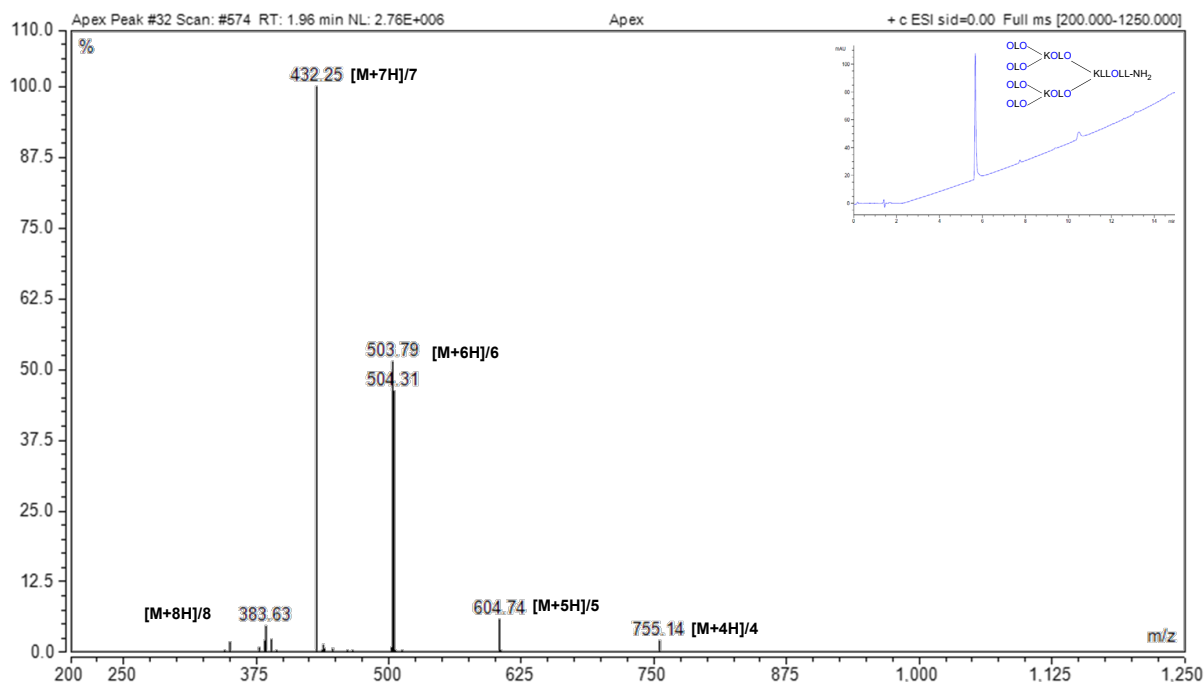

Method: 10% to 70% of B into A in 15 min

**G1KLK-L<sub>2</sub>KL<sub>2</sub>: MW=1465.04**

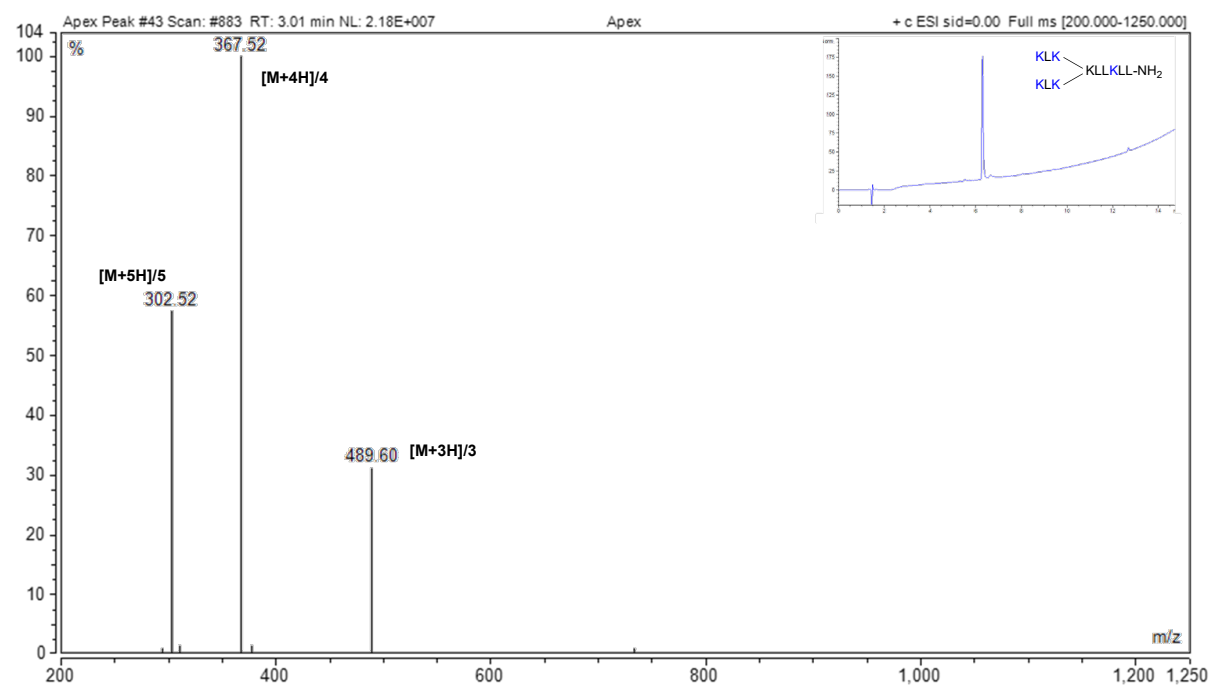

Method: 5% to 95% of B into A in 15 min.

**G1RLR-L<sub>2</sub>KL<sub>2</sub>: MW=1604.10**

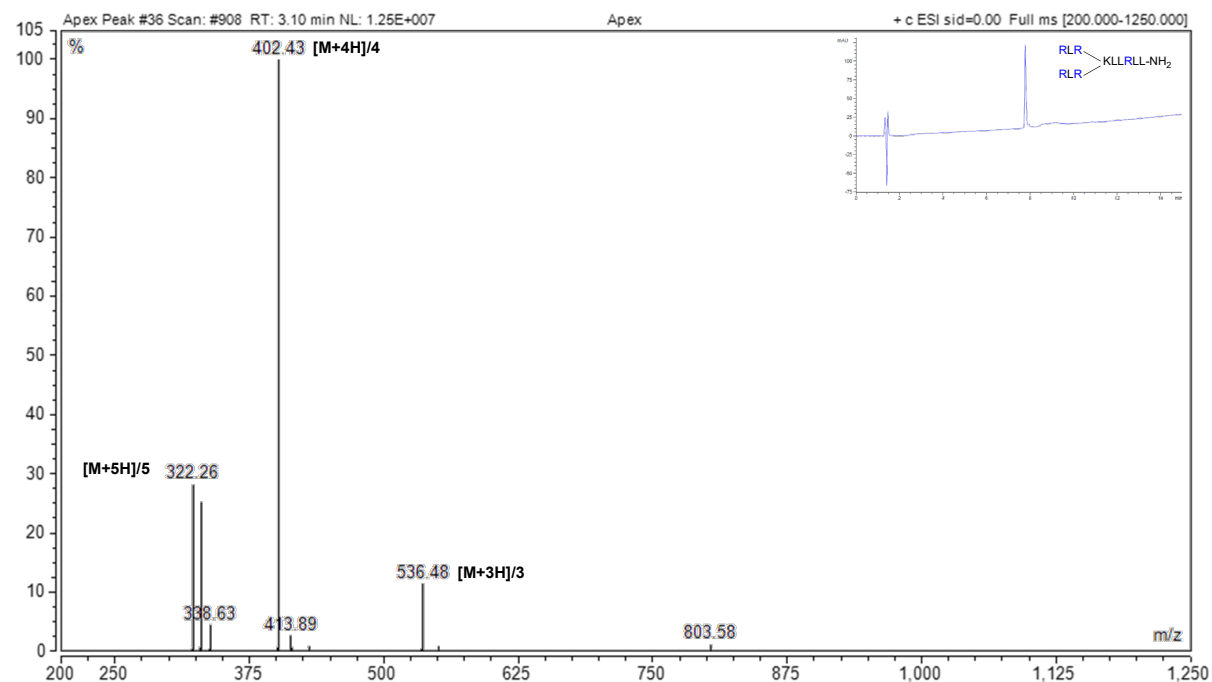

Method: 10% to 60% of B into A in 15 min.

Apex Peak #59 Scan: #1051 RT: 3.58 min NL: 2.71E+007

Apex

+ c ESI sid=0.00 Full ms [100,000-1250,000]

Mass spectrum showing relative intensity (%) versus m/z. The base peak is at m/z 349.77 [M+4H]/4. Other labeled peaks include m/z 288.34 [M+5H]/5, 296.48, 465.94 [M+3H]/3, and 697.88 [M+2H]/2. The inset shows the total ion chromatogram (TIC) with a single sharp peak at 3.58 min.

| m/z    | Relative Intensity (%) | Charge State |
|--------|------------------------|--------------|
| 288.34 | ~15                    | [M+5H]/5     |
| 296.48 | ~10                    |              |
| 349.77 | 100                    | [M+4H]/4     |
| 465.94 | ~30                    | [M+3H]/3     |
| 697.88 | ~2                     | [M+2H]/2     |

Method: 10% to 60% of B into A in 15 min.
